# Supplementary material for: Impacts of structural change in global trade on sustainable development
Source: Research Square preprint supplement (doi:10.21203/rs.3.rs-745748/v1), 2021-08-20
Supplement: Supplementary file 1 [file 74ecd4683bbd366b416dffd0.xlsx]

## Sheet: Figure 1
a)
	Ind 1	Ind 2	Ind 3	Ind 4	Ind 5	Ind 6	Ind 7	Ind 8	Ind 9	Ind 10	Ind 11	Ind 12	Ind 13
2004-2007	4.83256	11.5592	9.76012	2.27336	4.30792	0.00344234	4.16969	2.6319	0.0366908	3.8846	6.1462	3.22888	0.0755803
2007-2011	-2.3839	6.09593	16.5265	0.188665	-4.35286	6.31738e-05	1.79803	-0.383378	-0.0741191	-0.669097	-1.29611	-3.60229	-0.160308
2011-2014	1.67038	1.56174	-5.331	1.92696	13.2964	0.000120751	-1.39216	2.05725	-0.0321233	0.852229	3.46978	0.870229	0.0961432
b)
	2004-2007	2007-2011	2011-2014
[0,3]	5	9	10
(3,5]	5	2	1
(5,+∞)	3	2	2

## Sheet: Figure 2
a)
2004-2007	Ind 1	Ind 2	Ind 3	Ind 4	Ind 5	Ind 6	Ind 7	Ind 8	Ind 9	Ind 10	Ind 11	Ind 12	Ind 13
High income	-0.158371	1.58696	9.8816	-1.04084	4.01788	-0.599697	-0.829893	-0.105254	-0.369835	-2.55011	0.424318	11.3495	-0.356689
Upper-middle income	4.03183	4.86278	3.15447	10.0898	5.07046	3.28885	11.2717	9.5558	2.8091	10.9178	7.98763	-5.66085	3.1224
Lower-middle income	11.4069	42.9363	15.0367	3.93397	7.76605	-1.70216	0.656524	-1.84117	-1.69167	-1.13591	25.4495	-7.1197	-0.529181
Low income	-4.67214	-6.75783	-9.72385	-6.76935	-25.537	-0.39113	6.14695	-22.7369	-1.71568	-6.7308	-10.1997	-7.27993	-1.74746
b)
2007-2011	Ind 1	Ind 2	Ind 3	Ind 4	Ind 5	Ind 6	Ind 7	Ind 8	Ind 9	Ind 10	Ind 11	Ind 12	Ind 13
High income	-1.21567	0.727021	-0.240232	-0.763122	7.88327	-0.249667	2.41483	0.20027	-0.370195	-1.11306	0.695735	-3.41402	-0.432008
Upper-middle income	0.522282	13.4165	35.8413	3.39661	-25.6575	1.37217	4.85913	2.25828	1.42419	1.83872	-0.0659952	-4.13978	1.68479
Lower-middle income	-7.01115	1.29517	16.5153	-1.80708	6.53045	-1.16803	-10.8704	-10.634	-0.771297	-7.25153	-10.2207	-4.75795	-1.90473
Low income	-0.433761	-7.36034	-14.1217	-13.1058	102.319	-2.72706	21.4909	20.3439	-1.61149	0.199254	11.5737	11.2301	-5.2555
c)
2011-2014	Ind 1	Ind 2	Ind 3	Ind 4	Ind 5	Ind 6	Ind 7	Ind 8	Ind 9	Ind 10	Ind 11	Ind 12	Ind 13
High income	-0.294995	-1.45036	-11.3441	-0.68003	5.43165	-0.402619	3.7854	-0.465496	-0.571644	-0.428945	0.0288317	-0.922444	-0.366415
Upper-middle income	-0.0528957	-0.453299	-9.06004	2.45991	-1.4875	0.778226	3.04547	1.79323	1.02634	2.32883	1.25299	0.771802	2.19739
Lower-middle income	5.45579	10.0912	2.61734	9.17019	68.4177	1.2241	-24.0814	11.938	1.75793	-2.8468	19.5176	6.11817	0.903711
Low income	10.0918	3.19127	13.2287	25.1571	15.3518	2.18502	38.055	23.9667	1.78788	36.0002	14.4132	5.90167	3.72416
d)
	2004-2007	2007-2011	2011-2014
High income	2	1	1
Upper-middle income	6	2	0
Lower-middle income	4	3	6
Low income	1	6	8

## Sheet: Figure 3
a)
Ind 2	High income		Upper-middle income		Lower-middle income		Low income
	Change in value added	Change in indicator	Change in value added	Change in indicator	Change in value added	Change in indicator	Change in value added	Change in indicator
2004-2007	-0.599697	1.58696	3.28885	4.86278	-1.70216	42.9363	-0.39113	-6.75783
2007-2011	-0.249667	0.727021	1.37217	13.4165	-1.16803	1.29517	-2.72706	-7.36034
2011-2014	-0.402619	-1.45036	0.778226	-0.453299	1.2241	10.0912	2.18502	3.19127
b)
Ind 3	High income		Upper-middle income		Lower-middle income		Low income
	Change in value added	Change in indicator	Change in value added	Change in indicator	Change in value added	Change in indicator	Change in value added	Change in indicator
2004-2007	-0.599697	9.8816	3.28885	3.15447	-1.70216	15.0367	-0.39113	-9.72385
2007-2011	-0.249667	-0.240232	1.37217	35.8413	-1.16803	16.5153	-2.72706	-14.1217
2011-2014	-0.402619	-11.3441	0.778226	-9.06004	1.2241	2.61734	2.18502	13.2287
c)
Ind 4	High income		Upper-middle income		Lower-middle income		Low income
	Change in value added	Change in indicator	Change in value added	Change in indicator	Change in value added	Change in indicator	Change in value added	Change in indicator
2004-2007	-0.599697	-1.04084	3.28885	10.0898	-1.70216	3.93397	-0.39113	-6.76935
2007-2011	-0.249667	-0.763122	1.37217	3.39661	-1.16803	-1.80708	-2.72706	-13.1058
2011-2014	-0.402619	-0.68003	0.778226	2.45991	1.2241	9.17019	2.18502	25.1571
d)
Ind 5	High income		Upper-middle income		Lower-middle income		Low income
	Change in value added	Change in indicator	Change in value added	Change in indicator	Change in value added	Change in indicator	Change in value added	Change in indicator
2004-2007	-0.599697	4.01788	3.28885	5.07046	-1.70216	7.76605	-0.39113	-25.537
2007-2011	-0.249667	7.88327	1.37217	-25.6575	-1.16803	6.53045	-2.72706	102.319
2011-2014	-0.402619	5.43165	0.778226	-1.4875	1.2241	68.4177	2.18502	15.3518
e)
Ind 7	High income		Upper-middle income		Lower-middle income		Low income
	Change in value added	Change in indicator	Change in value added	Change in indicator	Change in value added	Change in indicator	Change in value added	Change in indicator
2004-2007	-0.599697	-0.829893	3.28885	11.2717	-1.70216	0.656524	-0.39113	6.14695
2007-2011	-0.249667	2.41483	1.37217	4.85913	-1.16803	-10.8704	-2.72706	21.4909
2011-2014	-0.402619	3.7854	0.778226	3.04547	1.2241	-24.0814	2.18502	38.055
f)
Ind 8	High income		Upper-middle income		Lower-middle income		Low income
	Change in value added	Change in indicator	Change in value added	Change in indicator	Change in value added	Change in indicator	Change in value added	Change in indicator
2004-2007	-0.599697	-0.105254	3.28885	9.5558	-1.70216	-1.84117	-0.39113	-22.7369
2007-2011	-0.249667	0.20027	1.37217	2.25828	-1.16803	-10.634	-2.72706	20.3439
2011-2014	-0.402619	-0.465496	0.778226	1.79323	1.2241	11.938	2.18502	23.9667
g)
Ind 10	High income		Upper-middle income		Lower-middle income		Low income
	Change in value added	Change in indicator	Change in value added	Change in indicator	Change in value added	Change in indicator	Change in value added	Change in indicator
2004-2007	-0.599697	-2.55011	3.28885	10.9178	-1.70216	-1.13591	-0.39113	-6.7308
2007-2011	-0.249667	-1.11306	1.37217	1.83872	-1.16803	-7.25153	-2.72706	0.199254
2011-2014	-0.402619	-0.428945	0.778226	2.32883	1.2241	-2.8468	2.18502	36.0002
h)
Ind 11	High income		Upper-middle income		Lower-middle income		Low income
	Change in value added	Change in indicator	Change in value added	Change in indicator	Change in value added	Change in indicator	Change in value added	Change in indicator
2004-2007	-0.599697	0.424318	3.28885	7.98763	-1.70216	25.4495	-0.39113	-10.1997
2007-2011	-0.249667	0.695735	1.37217	-0.0659952	-1.16803	-10.2207	-2.72706	11.5737
2011-2014	-0.402619	0.0288317	0.778226	1.25299	1.2241	19.5176	2.18502	14.4132
i)
Ind 12	High income		Upper-middle income		Lower-middle income		Low income
	Change in value added	Change in indicator	Change in value added	Change in indicator	Change in value added	Change in indicator	Change in value added	Change in indicator
2004-2007	-0.599697	11.3495	3.28885	-5.66085	-1.70216	-7.1197	-0.39113	-7.27993
2007-2011	-0.249667	-3.41402	1.37217	-4.13978	-1.16803	-4.75795	-2.72706	11.2301
2011-2014	-0.402619	-0.922444	0.778226	0.771802	1.2241	6.11817	2.18502	5.90167

## Sheet: Figure 4
a)
Ind 2	EU27		USA		BRA		RUS		IND		CHN		ZAF
	Change in value added	Change in indicator	Change in value added	Change in indicator	Change in value added	Change in indicator	Change in value added	Change in indicator	Change in value added	Change in indicator	Change in value added	Change in indicator	Change in value added	Change in indicator
2004-2007	-1.26437	0.0522797	0.45071	3.88851	-3.20693	-1.8475	-3.16543	10.7018	-2.77497	-0.597901	8.73377	8.5574	-3.43396	-11.0381
2007-2011	0.51829	-1.04903	0.55275	-1.93264	-2.64296	-1.97853	0.181477	-4.92968	0.213967	2.66893	4.99366	0.915536	-4.4771	13.2465
2011-2014	-0.210549	16.2204	-0.526952	-6.66516	1.85468	3.00787	1.00772	7.04787	3.63458	3.36589	2.25524	1.39216	-3.73357	-4.62461
b)
Ind 3	EU27		USA		BRA		RUS		IND		CHN		ZAF
	Change in value added	Change in indicator	Change in value added	Change in indicator	Change in value added	Change in indicator	Change in value added	Change in indicator	Change in value added	Change in indicator	Change in value added	Change in indicator	Change in value added	Change in indicator
2004-2007	-1.26437	-1.3263	0.45071	-0.916035	-3.20693	-3.36817	-3.16543	3.79896	-2.77497	-1.17052	8.73377	11.7599	-3.43396	-12.4101
2007-2011	0.51829	8.48822	0.55275	-10.3056	-2.64296	1.56074	0.181477	0.577183	0.213967	3.54923	4.99366	2.66316	-4.4771	-9.2844
2011-2014	-0.210549	4.8449	-0.526952	-3.86966	1.85468	-0.887105	1.00772	9.3857	3.63458	5.10718	2.25524	1.92347	-3.73357	-0.607191
c)
Ind 4	EU27		USA		BRA		RUS		IND		CHN		ZAF
	Change in value added	Change in indicator	Change in value added	Change in indicator	Change in value added	Change in indicator	Change in value added	Change in indicator	Change in value added	Change in indicator	Change in value added	Change in indicator	Change in value added	Change in indicator
2004-2007	-1.26437	-1.42644	0.45071	0.302657	-3.20693	-10.238	-3.16543	-6.97451	-2.77497	-3.64342	8.73377	19.2978	-3.43396	-6.51608
2007-2011	0.51829	2.21834	0.55275	0.141531	-2.64296	-6.11327	0.181477	-0.621679	0.213967	2.86638	4.99366	8.05024	-4.4771	-9.05756
2011-2014	-0.210549	-0.545488	-0.526952	-1.40492	1.85468	3.62324	1.00772	0.971991	3.63458	12.6049	2.25524	4.70759	-3.73357	-6.62867
d)
Ind 5	EU27		USA		BRA		RUS		IND		CHN		ZAF
	Change in value added	Change in indicator	Change in value added	Change in indicator	Change in value added	Change in indicator	Change in value added	Change in indicator	Change in value added	Change in indicator	Change in value added	Change in indicator	Change in value added	Change in indicator
2004-2007	-1.26437	6.41327	0.45071	-0.491254	-3.20693	7.69629	-3.16543	-10.5757	-2.77497	-7.40172	8.73377	9.93908	-3.43396	-7.74439
2007-2011	0.51829	-3.71686	0.55275	26.81	-2.64296	-24.8871	0.181477	12.8018	0.213967	-41.9138	4.99366	-9.89989	-4.4771	-11.2467
2011-2014	-0.210549	2.09389	-0.526952	1.10752	1.85468	20.1089	1.00772	3.11967	3.63458	32.9509	2.25524	-0.0363051	-3.73357	-14.7826
e)
Ind 7	EU27		USA		BRA		RUS		IND		CHN		ZAF
	Change in value added	Change in indicator	Change in value added	Change in indicator	Change in value added	Change in indicator	Change in value added	Change in indicator	Change in value added	Change in indicator	Change in value added	Change in indicator	Change in value added	Change in indicator
2004-2007	-1.26437	-0.562533	0.45071	2.4293	-3.20693	-3.35287	-3.16543	-4.79622	-2.77497	-11.1985	8.73377	14.5711	-3.43396	33.4679
2007-2011	0.51829	13.8751	0.55275	5.1975	-2.64296	0.321475	0.181477	6.02849	0.213967	-22.2118	4.99366	4.59393	-4.4771	-8.18588
2011-2014	-0.210549	5.00174	-0.526952	0.345113	1.85468	-8.4654	1.00772	-7.18312	3.63458	-41.2907	2.25524	5.06905	-3.73357	-14.9721
f)
Ind 8	EU27		USA		BRA		RUS		IND		CHN		ZAF
	Change in value added	Change in indicator	Change in value added	Change in indicator	Change in value added	Change in indicator	Change in value added	Change in indicator	Change in value added	Change in indicator	Change in value added	Change in indicator	Change in value added	Change in indicator
2004-2007	-1.26437	-0.994424	0.45071	0.226744	-3.20693	-7.72991	-3.16543	-4.29319	-2.77497	-3.26678	8.73377	14.0937	-3.43396	-1.21827
2007-2011	0.51829	3.45283	0.55275	1.50338	-2.64296	-8.04074	0.181477	1.28583	0.213967	-1.18593	4.99366	5.14996	-4.4771	-15.4771
2011-2014	-0.210549	-0.868158	-0.526952	-0.706831	1.85468	4.21329	1.00772	2.18978	3.63458	7.89672	2.25524	2.97088	-3.73357	-2.82504
g)
Ind 10	EU27		USA		BRA		RUS		IND		CHN		ZAF
	Change in value added	Change in indicator	Change in value added	Change in indicator	Change in value added	Change in indicator	Change in value added	Change in indicator	Change in value added	Change in indicator	Change in value added	Change in indicator	Change in value added	Change in indicator
2004-2007	-1.26437	-1.30552	0.45071	0.817073	-3.20693	-14.1019	-3.16543	-11.6471	-2.77497	-4.39256	8.73377	16.6926	-3.43396	-3.18264
2007-2011	0.51829	2.88686	0.55275	1.69977	-2.64296	-9.38875	0.181477	-1.08055	0.213967	-5.1606	4.99366	4.81309	-4.4771	-8.52806
2011-2014	-0.210549	0.884779	-0.526952	-2.83857	1.85468	2.02985	1.00772	3.62421	3.63458	-5.45463	2.25524	3.668	-3.73357	-8.30697
h)
Ind 11	EU27		USA		BRA		RUS		IND		CHN		ZAF
	Change in value added	Change in indicator	Change in value added	Change in indicator	Change in value added	Change in indicator	Change in value added	Change in indicator	Change in value added	Change in indicator	Change in value added	Change in indicator	Change in value added	Change in indicator
2004-2007	-1.26437	-0.952988	0.45071	0.250866	-3.20693	-3.98621	-3.16543	-4.50653	-2.77497	-1.82691	8.73377	13.1022	-3.43396	-2.17785
2007-2011	0.51829	2.73371	0.55275	2.88923	-2.64296	-6.59719	0.181477	1.59603	0.213967	-2.79689	4.99366	3.83099	-4.4771	-13.6915
2011-2014	-0.210549	0.200005	-0.526952	-0.800777	1.85468	4.4633	1.00772	2.0381	3.63458	7.98437	2.25524	2.39606	-3.73357	-3.98931
i)
Ind 12	EU27		USA		BRA		RUS		IND		CHN		ZAF
	Change in value added	Change in indicator	Change in value added	Change in indicator	Change in value added	Change in indicator	Change in value added	Change in indicator	Change in value added	Change in indicator	Change in value added	Change in indicator	Change in value added	Change in indicator
2004-2007	-1.26437	-3.13433	0.45071	5.68218	-3.20693	-14.6069	-3.16543	44.5726	-2.77497	9.66209	8.73377	2.6988	-3.43396	-8.85756
2007-2011	0.51829	6.25227	0.55275	7.13548	-2.64296	-7.18632	0.181477	-11.0242	0.213967	0.691085	4.99366	-2.03795	-4.4771	-3.17446
2011-2014	-0.210549	1.53037	-0.526952	-1.83289	1.85468	3.20007	1.00772	-5.56481	3.63458	1.12492	2.25524	1.10182	-3.73357	-3.70535

## Sheet: Figure S2
		Ind 2			Ind 3			Ind 4			Ind 5			Ind 7			Ind 8			Ind 10			Ind 11			Ind 12
		Water pollution			Blue water consumption			Blue water withdrawal			Total fossil fuel consumption			Mineral resource use			CO2 emission			PM emissions			GHG emissions			Forest area use
		2004-2007	2007-2011	2011-2014	2004-2007	2007-2011	2011-2014	2004-2007	2007-2011	2011-2014	2004-2007	2007-2011	2011-2014	2004-2007	2007-2011	2011-2014	2004-2007	2007-2011	2011-2014	2004-2007	2007-2011	2011-2014	2004-2007	2007-2011	2011-2014	2004-2007	2007-2011	2011-2014
Decoupling (areas 1, 2, 3)	High income	20	26	24	27	28	26	31	35	27	17	26	29	25	25	25	20	32	28	27	24	31	17	26	28	24	21	24
	Upper-middle income	16	15	17	16	15	14	15	17	12	8	17	15	11	12	17	15	19	12	15	16	15	14	19	14	24	15	12
	Lower-middle income	23	15	14	25	10	18	16	22	19	17	21	23	19	15	18	18	23	18	18	21	23	16	21	18	21	19	15
	Low income	9	7	10	9	10	9	11	12	7	6	8	6	6	3	11	11	6	3	10	7	4	10	11	4	5	8	9
Coupling (areas 4, 5, 6)	High income	36	30	32	29	28	30	25	21	29	39	30	27	31	31	31	36	24	28	29	32	25	39	30	28	32	35	32
	Upper-middle income	15	16	14	15	16	17	16	14	19	23	14	16	20	19	14	16	12	19	16	15	16	17	12	17	7	16	19
	Lower-middle income	14	22	23	12	27	19	21	15	18	20	16	14	18	22	19	19	14	19	19	16	14	21	16	19	16	18	22
	Low income	8	10	7	8	7	8	6	5	10	11	9	11	11	14	6	6	11	14	7	10	13	7	6	13	11	8	7

## Sheet: Figure S3
a)
Australia
	2004-2007		2007-2011		2011-2014
	Change in value added	Change in indicator	Change in value added	Change in indicator	Change in value added	Change in indicator
Ind 2	-2.43003	-23.8178	0.607471	24.2392	3.97851	-1.60025
Ind 3	-2.43003	-10.9436	0.607471	-15.0523	3.97851	8.98002
Ind 4	-2.43003	-6.52602	0.607471	-1.80164	3.97851	2.1297
Ind 5	-2.43003	11.4662	0.607471	22.313	3.97851	44.4906
Ind 7	-2.43003	11.331	0.607471	31.1847	3.97851	38.9365
Ind 8	-2.43003	0.171888	0.607471	-2.03548	3.97851	5.14607
Ind 10	-2.43003	-2.38463	0.607471	-0.32502	3.97851	6.2663
Ind 11	-2.43003	-0.0784973	0.607471	2.72764	3.97851	10.4391
Ind 12	-2.43003	0.530983	0.607471	11.561	3.97851	4.07575
b)
Japan
	2004-2007		2007-2011		2011-2014
	Change in value added	Change in indicator	Change in value added	Change in indicator	Change in value added	Change in indicator
Ind 2	1.07371	0.686491	-5.70173	-6.2972	0.977953	1.45279
Ind 3	1.07371	0.279648	-5.70173	-9.3571	0.977953	0.926298
Ind 4	1.07371	-0.433523	-5.70173	-16.428	0.977953	0.815283
Ind 5	1.07371	156.22	-5.70173	6.36642	0.977953	-39.9757
Ind 7	1.07371	-10.2954	-5.70173	-20.8462	0.977953	-21.0577
Ind 8	1.07371	2.2169	-5.70173	-8.31313	0.977953	-0.248553
Ind 10	1.07371	-0.283755	-5.70173	-14.7432	0.977953	0.518031
Ind 11	1.07371	2.03539	-5.70173	-8.29626	0.977953	-0.561026
Ind 12	1.07371	19.187	-5.70173	21.2589	0.977953	1.55446
c)
Canada
	2004-2007		2007-2011		2011-2014
	Change in value added	Change in indicator	Change in value added	Change in indicator	Change in value added	Change in indicator
Ind 2	-2.49923	7.18315	-0.0196544	4.80105	1.92197	6.60551
Ind 3	-2.49923	-0.151561	-0.0196544	-2.85446	1.92197	3.93923
Ind 4	-2.49923	-2.32578	-0.0196544	-2.41705	1.92197	2.14849
Ind 5	-2.49923	6.68039	-0.0196544	15.0807	1.92197	27.8511
Ind 7	-2.49923	12.9618	-0.0196544	0.127422	1.92197	2.3815
Ind 8	-2.49923	-2.62053	-0.0196544	-1.05394	1.92197	6.36385
Ind 10	-2.49923	-6.65051	-0.0196544	-3.60006	1.92197	1.14604
Ind 11	-2.49923	0.516408	-0.0196544	-0.481618	1.92197	8.14889
Ind 12	-2.49923	-21.1874	-0.0196544	-2.0289	1.92197	3.79433

## Sheet: Figure S4
a)
Malaysia
	2004-2007		2007-2011		2011-2014
	Change in value added	Change in indicator	Change in value added	Change in indicator	Change in value added	Change in indicator
Ind 2	-4.51084	6.93143	-8.95925	-3.88064	-4.76659	-4.94978
Ind 3	-4.51084	8.57627	-8.95925	-1.83143	-4.76659	-10.4124
Ind 4	-4.51084	-0.74363	-8.95925	-5.75148	-4.76659	-2.65129
Ind 5	-4.51084	25.597	-8.95925	-5.77773	-4.76659	-11.6041
Ind 7	-4.51084	0.409389	-8.95925	18.261	-4.76659	-6.01501
Ind 8	-4.51084	-0.364973	-8.95925	-5.71207	-4.76659	-3.68857
Ind 10	-4.51084	1.9157	-8.95925	-2.44691	-4.76659	-4.39313
Ind 11	-4.51084	1.5711	-8.95925	-4.93072	-4.76659	-3.18727
Ind 12	-4.51084	-17.2918	-8.95925	-32.0068	-4.76659	-7.39135
b)
Mexico
	2004-2007		2007-2011		2011-2014
	Change in value added	Change in indicator	Change in value added	Change in indicator	Change in value added	Change in indicator
Ind 2	-0.135328	-0.703785	2.11678	0.277542	0.100311	2.32841
Ind 3	-0.135328	1.38402	2.11678	0.118365	0.100311	1.29879
Ind 4	-0.135328	0.743605	2.11678	1.50027	0.100311	-5.23333
Ind 5	-0.135328	-12.1999	2.11678	-20.9379	0.100311	3.36589
Ind 7	-0.135328	0.284846	2.11678	10.6242	0.100311	-3.9783
Ind 8	-0.135328	-0.253855	2.11678	1.47695	0.100311	-1.45114
Ind 10	-0.135328	2.32896	2.11678	-0.747121	0.100311	-3.69802
Ind 11	-0.135328	-2.67633	2.11678	-0.313414	0.100311	0.175586
Ind 12	-0.135328	-3.6994	2.11678	4.98242	0.100311	2.15755
c)
Turkey
	2004-2007		2007-2011		2011-2014
	Change in value added	Change in indicator	Change in value added	Change in indicator	Change in value added	Change in indicator
Ind 2	-1.37453	-2.33481	2.99561	2.3796	2.5045	1.40385
Ind 3	-1.37453	1.29215	2.99561	-0.679464	2.5045	14.9405
Ind 4	-1.37453	-0.139887	2.99561	8.82858	2.5045	3.27075
Ind 5	-1.37453	8.01795	2.99561	-13.361	2.5045	-1.333
Ind 7	-1.37453	2.22678	2.99561	7.2853	2.5045	8.44504
Ind 8	-1.37453	4.96851	2.99561	-1.73384	2.5045	2.36572
Ind 10	-1.37453	-0.676252	2.99561	10.0038	2.5045	3.05116
Ind 11	-1.37453	4.15549	2.99561	-1.22145	2.5045	2.3561
Ind 12	-1.37453	3.52705	2.99561	8.71551	2.5045	8.26691

## Sheet: Figure S5
a)
Indonesia
	2004-2007		2007-2011		2011-2014
	Change in value added	Change in indicator	Change in value added	Change in indicator	Change in value added	Change in indicator
Ind 2	-4.45919	-2.45335	-4.51827	-5.51376	0.410951	4.58419
Ind 3	-4.45919	-3.92624	-4.51827	-3.57344	0.410951	5.573
Ind 4	-4.45919	-0.525888	-4.51827	-1.86652	0.410951	1.10011
Ind 5	-4.45919	6.58575	-4.51827	10.3017	0.410951	-9.47489
Ind 7	-4.45919	7.39376	-4.51827	-11.2474	0.410951	-17.168
Ind 8	-4.45919	0.934243	-4.51827	1.64816	0.410951	-1.09685
Ind 10	-4.45919	6.27754	-4.51827	3.15183	0.410951	0.226838
Ind 11	-4.45919	0.251712	-4.51827	2.79564	0.410951	-1.18843
Ind 12	-4.45919	-22.0007	-4.51827	-11.8449	0.410951	4.74448
b)
Ukraine
	2004-2007		2007-2011		2011-2014
	Change in value added	Change in indicator	Change in value added	Change in indicator	Change in value added	Change in indicator
Ind 2	-0.802873	-3.6718	-4.20499	8.39582	-8.45695	25.0959
Ind 3	-0.802873	-5.42699	-4.20499	-2.209	-8.45695	18.5874
Ind 4	-0.802873	-0.26604	-4.20499	-10.2194	-8.45695	-14.7206
Ind 5	-0.802873	-17.9068	-4.20499	14.6925	-8.45695	-29.8205
Ind 7	-0.802873	-7.45829	-4.20499	16.4114	-8.45695	-17.9408
Ind 8	-0.802873	-6.76594	-4.20499	-1.60548	-8.45695	-14.8056
Ind 10	-0.802873	-11.6906	-4.20499	-11.6665	-8.45695	-22.6356
Ind 11	-0.802873	-5.81202	-4.20499	-0.0339717	-8.45695	-9.83301
Ind 12	-0.802873	3.90687	-4.20499	1.47138	-8.45695	15.5865
c)
Egypt
	2004-2007		2007-2011		2011-2014
	Change in value added	Change in indicator	Change in value added	Change in indicator	Change in value added	Change in indicator
Ind 2	-2.22004	-2.10257	-0.996782	1.9953	-1.25161	2.75165
Ind 3	-2.22004	0.738751	-0.996782	4.79202	-1.25161	0.775904
Ind 4	-2.22004	4.74206	-0.996782	7.64891	-1.25161	-5.42456
Ind 5	-2.22004	-1.20995	-0.996782	-4.61455	-1.25161	-12.6056
Ind 7	-2.22004	-3.99878	-0.996782	0.365677	-1.25161	-0.28118
Ind 8	-2.22004	-2.39183	-0.996782	-0.489865	-1.25161	-2.04493
Ind 10	-2.22004	-3.85626	-0.996782	-1.33448	-1.25161	-8.08863
Ind 11	-2.22004	-2.61109	-0.996782	-1.16555	-1.25161	-1.65286
Ind 12	-2.22004	-32.3111	-0.996782	36.8131	-1.25161	38.8179

## Sheet: Figure S6
a)
Nepal
	2004-2007		2007-2011		2011-2014
	Change in value added	Change in indicator	Change in value added	Change in indicator	Change in value added	Change in indicator
Ind 2	-4.64431	-3.25083	-3.23342	-1.98979	-3.8767	-6.10205
Ind 3	-4.64431	-3.24167	-3.23342	-1.20593	-3.8767	-6.73845
Ind 4	-4.64431	-10.6605	-3.23342	-17.423	-3.8767	-13.4528
Ind 5	-4.64431	7.92355	-3.23342	4.00536	-3.8767	-9.78542
Ind 7	-4.64431	11.9436	-3.23342	-12.4555	-3.8767	-6.48118
Ind 8	-4.64431	-3.43608	-3.23342	-6.73006	-3.8767	-7.58237
Ind 10	-4.64431	-4.73528	-3.23342	-18.8787	-3.8767	-18.8434
Ind 11	-4.64431	-2.56157	-3.23342	-4.41589	-3.8767	-6.90603
Ind 12	-4.64431	11.105	-3.23342	-9.51445	-3.8767	-5.63259
b)
Uganda
	2004-2007		2007-2011		2011-2014
	Change in value added	Change in indicator	Change in value added	Change in indicator	Change in value added	Change in indicator
Ind 2	-1.02858	12.7027	-0.932889	0.102124	4.08459	-7.46999
Ind 3	-1.02858	26.0971	-0.932889	4.31254	4.08459	-18.8265
Ind 4	-1.02858	25.5695	-0.932889	0.303366	4.08459	14.4011
Ind 5	-1.02858	64.7126	-0.932889	-13.9475	4.08459	52.5648
Ind 7	-1.02858	91.6279	-0.932889	3.34185	4.08459	2.32921
Ind 8	-1.02858	-7.79023	-0.932889	0.680993	4.08459	8.15278
Ind 10	-1.02858	-5.21613	-0.932889	1.01337	4.08459	12.0733
Ind 11	-1.02858	2.30324	-0.932889	-2.06663	4.08459	5.57094
Ind 12	-1.02858	8.36951	-0.932889	-2.66379	4.08459	-0.818083
c)
Zimbabwe
	2004-2007		2007-2011		2011-2014
	Change in value added	Change in indicator	Change in value added	Change in indicator	Change in value added	Change in indicator
Ind 2	-12.6501	-20.9468	-11.8493	-6.75041	10.2168	11.7597
Ind 3	-12.6501	-28.9982	-11.8493	-26.2493	10.2168	12.3287
Ind 4	-12.6501	-24.5923	-11.8493	-32.3338	10.2168	7.17787
Ind 5	-12.6501	-28.0171	-11.8493	-14.5441	10.2168	20.4706
Ind 7	-12.6501	14.8834	-11.8493	-57.9281	10.2168	112.447
Ind 8	-12.6501	-15.3186	-11.8493	-22.8863	10.2168	14.8617
Ind 10	-12.6501	-3.34402	-11.8493	-42.4829	10.2168	18.9899
Ind 11	-12.6501	-15.3192	-11.8493	-18.19	10.2168	10.855
Ind 12	-12.6501	-2.44624	-11.8493	-4.4308	10.2168	-0.379353
