# Supplementary material for: Impacts of structural change in global trade on sustainable development
Source: Research Square preprint supplement (doi:10.21203/rs.3.rs-745748/v1), 2021-08-20
Supplement: Supplementary file 2 [file a06ac7f2cb6a6b4ec627ead1.xlsx]

## Sheet: Country category
GTAP (version 10)				WIOD (2016 release)			EXIOBASE
No.	String	Code	Description	No.	Code	Description	No.	Code	Description
1	aus	AUS	Australia	1	AUS	Australia	38	AU	Australia
2	nzl	NZL	New Zealand	44	RoW	Rest of the World	45	WA	RoW Asia and Pacific
3	xoc	XOC	Rest of Oceania	44	RoW	Rest of the World	45	WA	RoW Asia and Pacific
4	chn	CHN	China	8	CHN	China	31	CN	China
5	hkg	HKG	Hong Kong	44	RoW	Rest of the World	31	CN	China
6	jpn	JPN	Japan	25	JPN	Japan	30	JP	Japan
7	kor	KOR	Korea Republic of	26	KOR	South Korea	33	KR	South Korea
8	mng	MNG	Mongolia	44	RoW	Rest of the World	45	WA	RoW Asia and Pacific
9	twn	TWN	Taiwan	42	TWN	Taiwan	41	TW	Taiwan
10	xea	XEA	Rest of East Asia	44	RoW	Rest of the World	45	WA	RoW Asia and Pacific
11	brn	BRN	Brunei Darussalam	44	RoW	Rest of the World	45	WA	RoW Asia and Pacific
12	khm	KHM	Cambodia	44	RoW	Rest of the World	45	WA	RoW Asia and Pacific
13	idn	IDN	Indonesia	21	IDN	Indonesia	43	ID	Indonesia
14	lao	LAO	Lao People's Democratic Republic	44	RoW	Rest of the World	45	WA	RoW Asia and Pacific
15	mys	MYS	Malaysia	44	RoW	Rest of the World	45	WA	RoW Asia and Pacific
16	phl	PHL	Philippines	44	RoW	Rest of the World	45	WA	RoW Asia and Pacific
17	sgp	SGP	Singapore	44	RoW	Rest of the World	45	WA	RoW Asia and Pacific
18	tha	THA	Thailand	44	RoW	Rest of the World	45	WA	RoW Asia and Pacific
19	vnm	VNM	Viet Nam	44	RoW	Rest of the World	45	WA	RoW Asia and Pacific
20	xse	XSE	Rest of Southeast Asia	44	RoW	Rest of the World	45	WA	RoW Asia and Pacific
21	bgd	BGD	Bangladesh	44	RoW	Rest of the World	45	WA	RoW Asia and Pacific
22	ind	IND	India	22	IND	India	35	IN	India
23	npl	NPL	Nepal	44	RoW	Rest of the World	45	WA	RoW Asia and Pacific
24	pak	PAK	Pakistan	44	RoW	Rest of the World	45	WA	RoW Asia and Pacific
25	lka	LKA	Sri Lanka	44	RoW	Rest of the World	45	WA	RoW Asia and Pacific
26	xsa	XSA	Rest of South Asia	44	RoW	Rest of the World	45	WA	RoW Asia and Pacific
27	can	CAN	Canada	6	CAN	Canada	32	CA	Canada
28	usa	USA	United States of America	43	USA	USA	29	US	United States
29	mex	MEX	Mexico	30	MEX	Mexico	36	MX	Mexico
30	xna	XNA	Rest of North America	44	RoW	Rest of the World	46	WL	RoW America
31	arg	ARG	Argentina	44	RoW	Rest of the World	46	WL	RoW America
32	bol	BOL	Bolivia, Plurinational State of	44	RoW	Rest of the World	46	WL	RoW America
33	bra	BRA	Brazil	5	BRA	Brazil	34	BR	Brazil
34	chl	CHL	Chile	44	RoW	Rest of the World	46	WL	RoW America
35	col	COL	Colombia	44	RoW	Rest of the World	46	WL	RoW America
36	ecu	ECU	Ecuador	44	RoW	Rest of the World	46	WL	RoW America
37	pry	PRY	Paraguay	44	RoW	Rest of the World	46	WL	RoW America
38	per	PER	Peru	44	RoW	Rest of the World	46	WL	RoW America
39	ury	URY	Uruguay	44	RoW	Rest of the World	46	WL	RoW America
40	ven	VEN	Venezuela	44	RoW	Rest of the World	46	WL	RoW America
41	xsm	XSM	Rest of South America	44	RoW	Rest of the World	46	WL	RoW America
42	cri	CRI	Costa Rica	44	RoW	Rest of the World	46	WL	RoW America
43	gtm	GTM	Guatemala	44	RoW	Rest of the World	46	WL	RoW America
44	hnd	HND	Honduras	44	RoW	Rest of the World	46	WL	RoW America
45	nic	NIC	Nicaragua	44	RoW	Rest of the World	46	WL	RoW America
46	pan	PAN	Panama	44	RoW	Rest of the World	46	WL	RoW America
47	slv	SLV	El Salvador	44	RoW	Rest of the World	46	WL	RoW America
48	xca	XCA	Rest of Central America	44	RoW	Rest of the World	46	WL	RoW America
49	dom	DOM	Dominican Republic	44	RoW	Rest of the World	46	WL	RoW America
50	jam	JAM	Jamaica	44	RoW	Rest of the World	46	WL	RoW America
51	pri	PRI	Puerto Rico	44	RoW	Rest of the World	46	WL	RoW America
52	tto	TTO	Trinidad and Tobago	44	RoW	Rest of the World	46	WL	RoW America
53	xcb	XCB	Caribbean	44	RoW	Rest of the World	46	WL	RoW America
54	aut	AUT	Austria	2	AUT	Austria	1	AT	Austria
55	bel	BEL	Belgium	3	BEL	Belgium	2	BE	Belgium
56	bgr	BGR	Bulgaria	4	BGR	Bulgaria	3	BG	Bulgaria
57	hrv	HRV	Croatia	19	HRV	Croatia	13	HR	Croatia
58	cyp	CYP	Cyprus	9	CYP	Cyprus	4	CY	Cyprus
59	cze	CZE	Czech Republic	10	CZE	Czech Republic	5	CZ	Czech Republic
60	dnk	DNK	Denmark	12	DNK	Denmark	7	DK	Denmark
61	est	EST	Estonia	14	EST	Estonia	8	EE	Estonia
62	fin	FIN	Finland	15	FIN	Finland	10	FI	Finland
63	fra	FRA	France	16	FRA	France	11	FR	France
64	deu	DEU	Germany	11	DEU	Germany	6	DE	Germany
65	grc	GRC	Greece	18	GRC	Greece	12	GR	Greece
66	hun	HUN	Hungary	20	HUN	Hungary	14	HU	Hungary
67	irl	IRL	Ireland	23	IRL	Ireland	15	IE	Ireland
68	ita	ITA	Italy	24	ITA	Italy	16	IT	Italy
69	lva	LVA	Latvia	29	LVA	Latvia	19	LV	Latvia
70	ltu	LTU	Lithuania	27	LTU	Lithuania	17	LT	Lithuania
71	lux	LUX	Luxembourg	28	LUX	Luxembourg	18	LU	Luxembourg
72	mlt	MLT	Malta	31	MLT	Malta	20	MT	Malta
73	nld	NLD	Netherlands	32	NLD	The Netherlands	21	NL	Netherlands
74	pol	POL	Poland	34	POL	Poland	22	PL	Poland
75	prt	PRT	Portugal	35	PRT	Portugal	23	PT	Portugal
76	rou	ROU	Romania	36	ROU	Romania	24	RO	Romania
77	svk	SVK	Slovakia	38	SVK	Slovak Republic	27	SK	Slovakia
78	svn	SVN	Slovenia	39	SVN	Slovenia	26	SI	Slovenia
79	esp	ESP	Spain	13	ESP	Spain	9	ES	Spain
80	swe	SWE	Sweden	40	SWE	Sweden	25	SE	Sweden
81	gbr	GBR	United Kingdom	17	GBR	UK	28	GB	United Kingdom
82	che	CHE	Switzerland	7	CHE	Switzerland	39	CH	Switzerland
83	nor	NOR	Norway	33	NOR	Norway	42	NO	Norway
84	xef	XEF	Rest of EFTA	44	RoW	Rest of the World	47	WE	RoW Europe
85	alb	ALB	Albania	44	RoW	Rest of the World	47	WE	RoW Europe
86	blr	BLR	Belarus	44	RoW	Rest of the World	47	WE	RoW Europe
87	rus	RUS	Russian Federation	37	RUS	Russia	37	RU	Russia
88	ukr	UKR	Ukraine	44	RoW	Rest of the World	47	WE	RoW Europe
89	xee	XEE	Rest of Eastern Europe	44	RoW	Rest of the World	47	WE	RoW Europe
90	xer	XER	Rest of Europe	44	RoW	Rest of the World	47	WE	RoW Europe
91	kaz	KAZ	Kazakhstan	44	RoW	Rest of the World	45	WA	RoW Asia and Pacific
92	kgz	KGZ	Kyrgyzstan	44	RoW	Rest of the World	45	WA	RoW Asia and Pacific
93	tjk	TJK	Tajikistan	44	RoW	Rest of the World	45	WA	RoW Asia and Pacific
94	xsu	XSU	Rest of Former Soviet Union	44	RoW	Rest of the World	45	WA	RoW Asia and Pacific
95	arm	ARM	Armenia	44	RoW	Rest of the World	45	WA	RoW Asia and Pacific
96	aze	AZE	Azerbaijan	44	RoW	Rest of the World	45	WA	RoW Asia and Pacific
97	geo	GEO	Georgia	44	RoW	Rest of the World	45	WA	RoW Asia and Pacific
98	bhr	BHR	Bahrain	44	RoW	Rest of the World	49	WM	RoW Middle East
99	irn	IRN	Iran Islamic Republic of	44	RoW	Rest of the World	45	WA	RoW Asia and Pacific
100	isr	ISR	Israel	44	RoW	Rest of the World	49	WM	RoW Middle East
101	jor	JOR	Jordan	44	RoW	Rest of the World	49	WM	RoW Middle East
102	kwt	KWT	Kuwait	44	RoW	Rest of the World	49	WM	RoW Middle East
103	omn	OMN	Oman	44	RoW	Rest of the World	49	WM	RoW Middle East
104	qat	QAT	Qatar	44	RoW	Rest of the World	49	WM	RoW Middle East
105	sau	SAU	Saudi Arabia	44	RoW	Rest of the World	49	WM	RoW Middle East
106	tur	TUR	Turkey	41	TUR	Turkey	40	TR	Turkey
107	are	ARE	United Arab Emirates	44	RoW	Rest of the World	49	WM	RoW Middle East
108	xws	XWS	Rest of Western Asia	44	RoW	Rest of the World	49	WM	RoW Middle East
109	egy	EGY	Egypt	44	RoW	Rest of the World	48	WF	RoW Africa
110	mar	MAR	Morocco	44	RoW	Rest of the World	48	WF	RoW Africa
111	tun	TUN	Tunisia	44	RoW	Rest of the World	48	WF	RoW Africa
112	xnf	XNF	Rest of North Africa	44	RoW	Rest of the World	48	WF	RoW Africa
113	ben	BEN	Benin	44	RoW	Rest of the World	48	WF	RoW Africa
114	bfa	BFA	Burkina Faso	44	RoW	Rest of the World	48	WF	RoW Africa
115	cmr	CMR	Cameroon	44	RoW	Rest of the World	48	WF	RoW Africa
116	civ	CIV	Cote d'Ivoire	44	RoW	Rest of the World	48	WF	RoW Africa
117	gha	GHA	Ghana	44	RoW	Rest of the World	48	WF	RoW Africa
118	gin	GIN	Guinea	44	RoW	Rest of the World	48	WF	RoW Africa
119	nga	NGA	Nigeria	44	RoW	Rest of the World	48	WF	RoW Africa
120	sen	SEN	Senegal	44	RoW	Rest of the World	48	WF	RoW Africa
121	tgo	TGO	Togo	44	RoW	Rest of the World	48	WF	RoW Africa
122	xwf	XWF	Rest of Western Africa	44	RoW	Rest of the World	48	WF	RoW Africa
123	xcf	XCF	Central Africa	44	RoW	Rest of the World	48	WF	RoW Africa
124	xac	XAC	South Central Africa	44	RoW	Rest of the World	48	WF	RoW Africa
125	eth	ETH	Ethiopia	44	RoW	Rest of the World	48	WF	RoW Africa
126	ken	KEN	Kenya	44	RoW	Rest of the World	48	WF	RoW Africa
127	mdg	MDG	Madagascar	44	RoW	Rest of the World	48	WF	RoW Africa
128	mwi	MWI	Malawi	44	RoW	Rest of the World	48	WF	RoW Africa
129	mus	MUS	Mauritius	44	RoW	Rest of the World	48	WF	RoW Africa
130	moz	MOZ	Mozambique	44	RoW	Rest of the World	48	WF	RoW Africa
131	rwa	RWA	Rwanda	44	RoW	Rest of the World	48	WF	RoW Africa
132	tza	TZA	Tanzania United Republic of	44	RoW	Rest of the World	48	WF	RoW Africa
133	uga	UGA	Uganda	44	RoW	Rest of the World	48	WF	RoW Africa
134	zmb	ZMB	Zambia	44	RoW	Rest of the World	48	WF	RoW Africa
135	zwe	ZWE	Zimbabwe	44	RoW	Rest of the World	48	WF	RoW Africa
136	xec	XEC	Rest of Eastern Africa	44	RoW	Rest of the World	48	WF	RoW Africa
137	bwa	BWA	Botswana	44	RoW	Rest of the World	48	WF	RoW Africa
138	nam	NAM	Namibia	44	RoW	Rest of the World	48	WF	RoW Africa
139	zaf	ZAF	South Africa	44	RoW	Rest of the World	44	ZA	South Africa
140	xsc	XSC	Rest of South African Customs Union	44	RoW	Rest of the World	48	WF	RoW Africa
141	xtw	XTW	Rest of the World	44	RoW	Rest of the World	-	-	-

## Sheet: Sector category
GTAP		WIOD 2016 Release			GTAP		EXIOBASE
No.	String	No.	Description		No.	String	No.	Description
1	pdr	1	Crop and animal production, hunting and related service activities		1	pdr	1	Paddy rice
2	wht				2	wht	2	Wheat
3	gro				3	gro	3	Cereal grains nec
4	v_f				4	v_f	4	Vegetables, fruit, nuts
5	osd				5	osd	5	Oil seeds
6	c_b				6	c_b	6	Sugar cane, sugar beet
7	pfb				7	pfb	7	Plant-based fibers
8	ocr				8	ocr	8	Crops nec
9	ctl				9	ctl	9	Cattle
10	oap				10	oap	10	Pigs
11	rmk						11	Poultry
12	wol						12	Meat animals nec
13	frs	2	Forestry and logging				13	Animal products nec
14	fsh	3	Fishing and aquaculture		11	rmk	14	Raw milk
15	coa	4	Mining and quarrying		12	wol	15	Wool, silk-worm cocoons
16	oil						16	Manure (conventional treatment)
17	gas						17	Manure (biogas treatment)
18	oxt				13	frs	18	Products of forestry, logging and related services (02)
19	cmt	5	Manufacture of food products, beverages and tobacco products		14	fsh	19	Fish and other fishing products; services incidental of fishing (05)
20	omt				15	coa	20	Anthracite
21	vol						21	Coking Coal
22	mil						22	Other Bituminous Coal
23	pcr						23	Sub-Bituminous Coal
24	sgr						24	Patent Fuel
25	ofd						25	Lignite/Brown Coal
26	b_t						26	BKB/Peat Briquettes
27	tex	6	Manufacture of textiles, wearing apparel and leather products				27	Peat
28	wap				16	oil	28	Crude petroleum and services related to crude oil extraction, excluding surveying
29	lea				17	gas	29	Natural gas and services related to natural gas extraction, excluding surveying
30	lum	7	Manufacture of wood and of products of wood and cork, except furniture; manufacture of articles of straw and plaiting materials				30	Natural Gas Liquids
31	ppp	8	Manufacture of paper and paper products				31	Other Hydrocarbons
		9	Printing and reproduction of recorded media		18	oxt	32	Uranium and thorium ores (12)
32	p_c	10	Manufacture of coke and refined petroleum products				33	Iron ores
33	chm	11	Manufacture of chemicals and chemical products				34	Copper ores and concentrates
34	bph	12	Manufacture of basic pharmaceutical products and pharmaceutical preparations				35	Nickel ores and concentrates
35	rpp	13	Manufacture of rubber and plastic products				36	Aluminium ores and concentrates
36	nmm	14	Manufacture of other non-metallic mineral products				37	Precious metal ores and concentrates
37	i_s	15	Manufacture of basic metals				38	Lead, zinc and tin ores and concentrates
38	nfm						39	Other non-ferrous metal ores and concentrates
39	fmp	16	Manufacture of fabricated metal products, except machinery and equipment				40	Stone
40	ele	17	Manufacture of computer, electronic and optical products				41	Sand and clay
41	eeq	18	Manufacture of electrical equipment				42	Chemical and fertilizer minerals, salt and other mining and quarrying products nec
42	ome	19	Manufacture of machinery and equipment n.e.c.		19	cmt	43	Products of meat cattle
43	mvh	20	Manufacture of motor vehicles, trailers and semi-trailers		20	omt	44	Products of meat pigs
44	otn	21	Manufacture of other transport equipment				45	Products of meat poultry
45	omf	22	Manufacture of furniture; other manufacturing				46	Meat products nec
		23	Repair and installation of machinery and equipment		21	vol	47	products of Vegetable oils and fats
46	ely	24	Electricity, gas, steam and air conditioning supply		22	mil	48	Dairy products
47	gdt				23	pcr	49	Processed rice
48	wtr	25	Water collection, treatment and supply		24	sgr	50	Sugar
		26	Sewerage; waste collection, treatment and disposal activities; materials recovery; remediation activities and other waste management services		25	ofd	51	Food products nec
49	cns	27	Construction				53	Fish products
50	trd	28	Wholesale and retail trade and repair of motor vehicles and motorcycles		26	b_t	52	Beverages
		29	Wholesale trade, except of motor vehicles and motorcycles				54	Tobacco products (16)
		30	Retail trade, except of motor vehicles and motorcycles		27	tex	55	Textiles (17)
51	afs	36	Accommodation and food service activities		28	wap	56	Wearing apparel; furs (18)
52	otp	31	Land transport and transport via pipelines		29	lea	57	Leather and leather products (19)
53	wtp	32	Water transport		30	lum	58	Wood and products of wood and cork (except furniture); articles of straw and plaiting materials (20)
54	atp	33	Air transport				59	Wood material for treatment, Re-processing of secondary wood material into new wood material
55	whs	34	Warehousing and support activities for transportation		31	ppp	60	Pulp
56	cmn	35	Postal and courier activities				61	Secondary paper for treatment, Re-processing of secondary paper into new pulp
		37	Publishing activities				62	Paper and paper products
		38	Motion picture, video and television programme production, sound recording and music publishing activities; programming and broadcasting activities				63	Printed matter and recorded media (22)
		39	Telecommunications		32	p_c	64	Coke Oven Coke
		40	Computer programming, consultancy and related activities; information service activities				65	Gas Coke
57	ofi	41	Financial service activities, except insurance and pension funding				66	Coal Tar
58	ins	42	Insurance, reinsurance and pension funding, except compulsory social security				67	Motor Gasoline
		43	Activities auxiliary to financial services and insurance activities				68	Aviation Gasoline
59	rsa	44	Real estate activities				69	Gasoline Type Jet Fuel
60	obs	45	Legal and accounting activities; activities of head offices; management consultancy activities				70	Kerosene Type Jet Fuel
		46	Architectural and engineering activities; technical testing and analysis				71	Kerosene
		47	Scientific research and development				72	Gas/Diesel Oil
		48	Advertising and market research				73	Heavy Fuel Oil
		49	Other professional, scientific and technical activities; veterinary activities				74	Refinery Gas
		50	Administrative and support service activities				75	Liquefied Petroleum Gases (LPG)
61	ros	54	Other service activities				76	Refinery Feedstocks
		55	Activities of households as employers; undifferentiated goods- and services-producing activities of households for own use				77	Ethane
62	osg	51	Public administration and defence; compulsory social security				78	Naphtha
		56	Activities of extraterritorial organizations and bodies				79	White Spirit & SBP
63	edu	52	Education				80	Lubricants
64	hht	53	Human health and social work activities				81	Bitumen
65	dwe						82	Paraffin Waxes
							83	Petroleum Coke
							84	Non-specified Petroleum Products
							85	Nuclear fuel
					33	chm	86	Plastics, basic
							87	Secondary plastic for treatment, Re-processing of secondary plastic into new plastic
							88	N-fertiliser
							89	P- and other fertiliser
							91	Charcoal
							92	Additives/Blending Components
							93	Biogasoline
							94	Biodiesels
							95	Other Liquid Biofuels
					34	bph	90	Chemicals nec
					35	rpp	96	Rubber and plastic products (25)
					36	nmm	97	Glass and glass products
							98	Secondary glass for treatment, Re-processing of secondary glass into new glass
							99	Ceramic goods
							100	Bricks, tiles and construction products, in baked clay
							101	Cement, lime and plaster
							102	Ash for treatment, Re-processing of ash into clinker
							103	Other non-metallic mineral products
					37	i_s	104	Basic iron and steel and of ferro-alloys and first products thereof
							105	Secondary steel for treatment, Re-processing of secondary steel into new steel
					38	nfm	106	Precious metals
							107	Secondary precious metals for treatment, Re-processing of secondary precious metals into new precious metals
							108	Aluminium and aluminium products
							109	Secondary aluminium for treatment, Re-processing of secondary aluminium into new aluminium
							110	Lead, zinc and tin and products thereof
							111	Secondary lead for treatment, Re-processing of secondary lead into new lead
							112	Copper products
							113	Secondary copper for treatment, Re-processing of secondary copper into new copper
							114	Other non-ferrous metal products
							115	Secondary other non-ferrous metals for treatment, Re-processing of secondary other non-ferrous metals into new other non-ferrous metals
							116	Foundry work services
					39	fmp	117	Fabricated metal products, except machinery and equipment (28)
					40	ele	119	Office machinery and computers (30)
							121	Radio, television and communication equipment and apparatus (32)
							122	Medical, precision and optical instruments, watches and clocks (33)
					41	eeq	120	Electrical machinery and apparatus nec (31)
					42	ome	118	Machinery and equipment nec (29)
					43	mvh	123	Motor vehicles, trailers and semi-trailers (34)
					44	otn	124	Other transport equipment (35)
					45	omf	125	Furniture; other manufactured goods nec (36)
							126	Secondary raw materials
							127	Bottles for treatment, Recycling of bottles by direct reuse
					46	ely	128	Electricity by coal
							129	Electricity by gas
							130	Electricity by nuclear
							131	Electricity by hydro
							132	Electricity by wind
							133	Electricity by petroleum and other oil derivatives
							134	Electricity by biomass and waste
							135	Electricity by solar photovoltaic
							136	Electricity by solar thermal
							137	Electricity by tide, wave, ocean
							138	Electricity by Geothermal
							139	Electricity nec
							140	Transmission services of electricity
							141	Distribution and trade services of electricity
					47	gdt	142	Coke oven gas
							143	Blast Furnace Gas
							144	Oxygen Steel Furnace Gas
							145	Gas Works Gas
							146	Biogas
							147	Distribution services of gaseous fuels through mains
					48	wtr	148	Steam and hot water supply services
							149	Collected and purified water, distribution services of water (41)
					49	cns	150	Construction work (45)
							151	Secondary construction material for treatment, Re-processing of secondary construction material into aggregates
					50	trd	152	Sale, maintenance, repair of motor vehicles, motor vehicles parts, motorcycles, motor cycles parts and accessoiries
							153	Retail trade services of motor fuel
							154	Wholesale trade and commission trade services, except of motor vehicles and motorcycles (51)
							155	Retail trade services, except of motor vehicles and motorcycles; repair services of personal and household goods (52)
					51	afs	156	Hotel and restaurant services (55)
					52	otp	157	Railway transportation services
							158	Other land transportation services
					53	wtp	159	Transportation services via pipelines
							160	Sea and coastal water transportation services
							161	Inland water transportation services
					54	atp	162	Air transport services (62)
					55	whs	163	Supporting and auxiliary transport services; travel agency services (63)
					56	cmn	164	Post and telecommunication services (64)
					57	ofi	165	Financial intermediation services, except insurance and pension funding services (65)
					58	ins	166	Insurance and pension funding services, except compulsory social security services (66)
							167	Services auxiliary to financial intermediation (67)
					59	rsa	168	Real estate services (70)
					60	obs	169	Renting services of machinery and equipment without operator and of personal and household goods (71)
							170	Computer and related services (72)
							171	Research and development services (73)
							172	Other business services (74)
					61	ros	197	Recreational, cultural and sporting services (92)
							198	Other services (93)
							199	Private households with employed persons (95)
					62	osg	173	Public administration and defence services; compulsory social security services (75)
					63	edu	174	Education services (80)
					64	hht	175	Health and social work services (85)
					65	dwe	176	Food waste for treatment: incineration
							177	Paper waste for treatment: incineration
							178	Plastic waste for treatment: incineration
							179	Intert/metal waste for treatment: incineration
							180	Textiles waste for treatment: incineration
							181	Wood waste for treatment: incineration
							182	Oil/hazardous waste for treatment: incineration
							183	Food waste for treatment: biogasification and land application
							184	Paper waste for treatment: biogasification and land application
							185	Sewage sludge for treatment: biogasification and land application
							186	Food waste for treatment: composting and land application
							187	Paper and wood waste for treatment: composting and land application
							188	Food waste for treatment: waste water treatment
							189	Other waste for treatment: waste water treatment
							190	Food waste for treatment: landfill
							191	Paper for treatment: landfill
							192	Plastic waste for treatment: landfill
							193	Inert/metal/hazardous waste for treatment: landfill
							194	Textiles waste for treatment: landfill
							195	Wood waste for treatment: landfill
							196	Membership organisation services nec (91)
							200	Extra-territorial organizations and bodies

## Sheet: Income group
Regions in GTAP 10
Nbr	Description	Code	Income group (WB 2014)
1	Australia	AUS	High income
2	New Zealand	NZL	High income
3	Rest of Oceania	XOC	Upper middle income
4	China	CHN	Upper middle income
5	Hong Kong	HKG	High income
6	Japan	JPN	High income
7	Korea Republic of	KOR	High income
8	Mongolia	MNG	Upper middle income
9	Taiwan	TWN	High income
10	Rest of East Asia	XEA	Lower middle income
11	Brunei Darussalam	BRN	High income
12	Cambodia	KHM	Low income
13	Indonesia	IDN	Lower middle income
14	Lao People's Democratic Republic	LAO	Lower middle income
15	Malaysia	MYS	Upper middle income
16	Philippines	PHL	Lower middle income
17	Singapore	SGP	High income
18	Thailand	THA	Upper middle income
19	Viet Nam	VNM	Lower middle income
20	Rest of Southeast Asia	XSE	Lower middle income
21	Bangladesh	BGD	Lower middle income
22	India	IND	Lower middle income
23	Nepal	NPL	Low income
24	Pakistan	PAK	Lower middle income
25	Sri Lanka	LKA	Lower middle income
26	Rest of South Asia	XSA	Lower middle income
27	Canada	CAN	High income
28	United States of America	USA	High income
29	Mexico	MEX	Upper middle income
30	Rest of North America	XNA	High income
31	Argentina	ARG	High income
32	Bolivia, Plurinational State of	BOL	Lower middle income
33	Brazil	BRA	Upper middle income
34	Chile	CHL	High income
35	Colombia	COL	Upper middle income
36	Ecuador	ECU	Upper middle income
37	Paraguay	PRY	Upper middle income
38	Peru	PER	Upper middle income
39	Uruguay	URY	High income
40	Venezuela	VEN	High income
41	Rest of South America	XSM	Lower middle income
42	Costa Rica	CRI	Upper middle income
43	Guatemala	GTM	Lower middle income
44	Honduras	HND	Lower middle income
45	Nicaragua	NIC	Lower middle income
46	Panama	PAN	Upper middle income
47	El Salvador	SLV	Lower middle income
48	Rest of Central America	XCA	Upper middle income
49	Dominican Republic	DOM	Upper middle income
50	Jamaica	JAM	Upper middle income
51	Puerto Rico	PRI	High income
52	Trinidad and Tobago	TTO	High income
53	Caribbean	XCB	High income
54	Austria	AUT	High income
55	Belgium	BEL	High income
56	Bulgaria	BGR	Upper middle income
57	Croatia	HRV	High income
58	Cyprus	CYP	High income
59	Czech Republic	CZE	High income
60	Denmark	DNK	High income
61	Estonia	EST	High income
62	Finland	FIN	High income
63	France	FRA	High income
64	Germany	DEU	High income
65	Greece	GRC	High income
66	Hungary	HUN	High income
67	Ireland	IRL	High income
68	Italy	ITA	High income
69	Latvia	LVA	High income
70	Lithuania	LTU	High income
71	Luxembourg	LUX	High income
72	Malta	MLT	High income
73	Netherlands	NLD	High income
74	Poland	POL	High income
75	Portugal	PRT	High income
76	Romania	ROU	Upper middle income
77	Slovakia	SVK	High income
78	Slovenia	SVN	High income
79	Spain	ESP	High income
80	Sweden	SWE	High income
81	United Kingdom	GBR	High income
82	Switzerland	CHE	High income
83	Norway	NOR	High income
84	Rest of EFTA	XEF	High income
85	Albania	ALB	Upper middle income
86	Belarus	BLR	Upper middle income
87	Russian Federation	RUS	High income
88	Ukraine	UKR	Lower middle income
89	Rest of Eastern Europe	XEE	Lower middle income
90	Rest of Europe	XER	High income
91	Kazakhstan	KAZ	Upper middle income
92	Kyrgyzstan	KGZ	Lower middle income
93	Tajikistan	TJK	Lower middle income
94	Rest of Former Soviet Union	XSU	Lower middle income
95	Armenia	ARM	Lower middle income
96	Azerbaijan	AZE	Upper middle income
97	Georgia	GEO	Lower middle income
98	Bahrain	BHR	High income
99	Iran Islamic Republic of	IRN	Upper middle income
100	Israel	ISR	High income
101	Jordan	JOR	Upper middle income
102	Kuwait	KWT	High income
103	Oman	OMN	High income
104	Qatar	QAT	High income
105	Saudi Arabia	SAU	High income
106	Turkey	TUR	Upper middle income
107	United Arab Emirates	ARE	High income
108	Rest of Western Asia	XWS	Lower middle income
109	Egypt	EGY	Lower middle income
110	Morocco	MAR	Lower middle income
111	Tunisia	TUN	Upper middle income
112	Rest of North Africa	XNF	Upper middle income
113	Benin	BEN	Low income
114	Burkina Faso	BFA	Low income
115	Cameroon	CMR	Lower middle income
116	Cote d'Ivoire	CIV	Lower middle income
117	Ghana	GHA	Lower middle income
118	Guinea	GIN	Low income
119	Nigeria	NGA	Lower middle income
120	Senegal	SEN	Lower middle income
121	Togo	TGO	Low income
122	Rest of Western Africa	XWF	Low income
123	Central Africa	XCF	Lower middle income
124	South Central Africa	XCA	Lower middle income
125	Ethiopia	ETH	Low income
126	Kenya	KEN	Lower middle income
127	Madagascar	MDG	Low income
128	Malawi	MWI	Low income
129	Mauritius	MUS	Upper middle income
130	Mozambique	MOZ	Low income
131	Rwanda	RWA	Low income
132	Tanzania United Republic of	TZA	Low income
133	Uganda	UGA	Low income
134	Zambia	ZMB	Lower middle income
135	Zimbabwe	ZWE	Low income
136	Rest of Eastern Africa	XEC	Low income
137	Botswana	BWA	Upper middle income
138	Namibia	NAM	Upper middle income
139	South Africa	ZAF	Upper middle income
140	Rest of South African Customs Union	XSC	Lower middle income
141	Rest of the World	XTW	Low income
